# Supplementary material
Source: publisher site journal article supplement (https://www.dovepress.com/article/582204)
Supplement: Supplementary file 1 [file 582204_Supplementary%20Figure%20and%20Table.pdf]

**Supplementary Table S1. Baseline characteristics by 6-month follow-up completion status**

| Characteristic                         | Completers        | Non-completers    | P value |
|----------------------------------------|-------------------|-------------------|---------|
| Eyes, n                                | 65                | 32                | -       |
| Age, years (mean $\pm$ SD)             | 38.00 $\pm$ 10.99 | 39.18 $\pm$ 11.86 | 0.703   |
| Sex, male, n (%)                       | 36 (55.4)         | 19 (59.4)         | 0.017   |
| Baseline HFA MD, dB<br>(mean $\pm$ SD) | -8.16 $\pm$ 5.80  | -10.76 $\pm$ 6.33 | 0.055   |
| Glaucoma severity, n (%)               |                   |                   | 0.251   |
| Mild                                   | 27 (41.5)         | 9 (28.1)          |         |
| Moderate                               | 20 (30.8)         | 9 (28.1)          |         |
| Severe                                 | 18 (27.7)         | 14 (43.8)         |         |

Patients with glaucoma (97 eyes) were categorized into mild-stage (HFA MD  $\geq$  -6dB), moderate-stage ( $-12\text{dB} \leq$  HFA MD  $<$  -6dB), and severe-stage (HFA MD  $<$  -12dB).

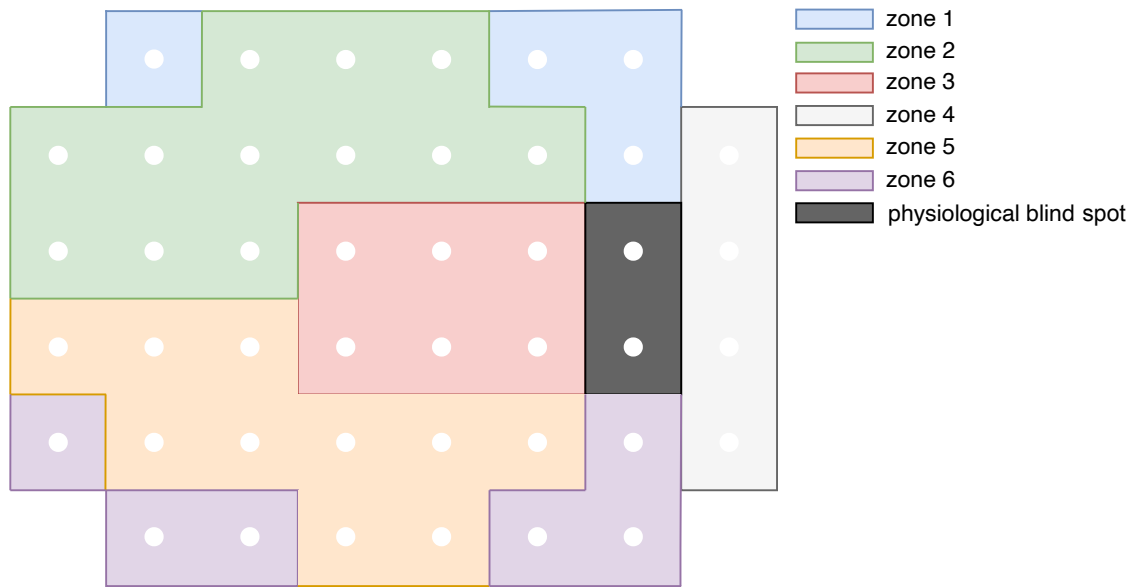

Supplementary Figure S1. Perimouse Garway-Heath map. White dots represent visual field loci.
